# Supplementary material for: Beyond Charge Transfer: The Impact of Auger Recombination and FRET on PL Quenching in an rGO-QDs System
Source: MDPI journal article supplement (doi:10.3390/nano11061623), 2021-06-21
Supplement: s1 [file s1]

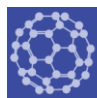

Supporting Information

# Beyond Charge Transfer: The Impact of Auger Recombination and FRET on PL Quenching in an rGO-QDs System

Anton A. Babaev <sup>1,\*</sup>, Anastasiia V. Sokolova <sup>1</sup>, Sergei A. Cherevko <sup>1</sup>, Kevin Berwick <sup>2</sup>, Alexander V. Baranov <sup>1</sup>, Anatoly V. Fedorov <sup>1</sup> and Aleksandr P. Litvin <sup>1</sup>

<sup>1</sup> Center of Information optical technology, ITMO University, 197101 St. Petersburg, Russia; avsokolova@itmo.ru (A.V.S.); s.cherevko@itmo.ru (S.A.C.); a\_v\_baranov@itmo.ru (A.V.B.); a\_v\_fedorov@itmo.ru (A.V.F.); litvin@itmo.ru (A.P.L.)

<sup>2</sup> School of Electrical and Electronic Engineering, TU Dublin, Grangegorman, Dublin 7, Ireland; kevin.berwick@tudublin.ie

\* Correspondence: a.a.babaev1@gmail.com

Photoluminescence and absorption spectra of initial QDs measured in tetrachloromethane colloidal solution are presented in Figure S1.

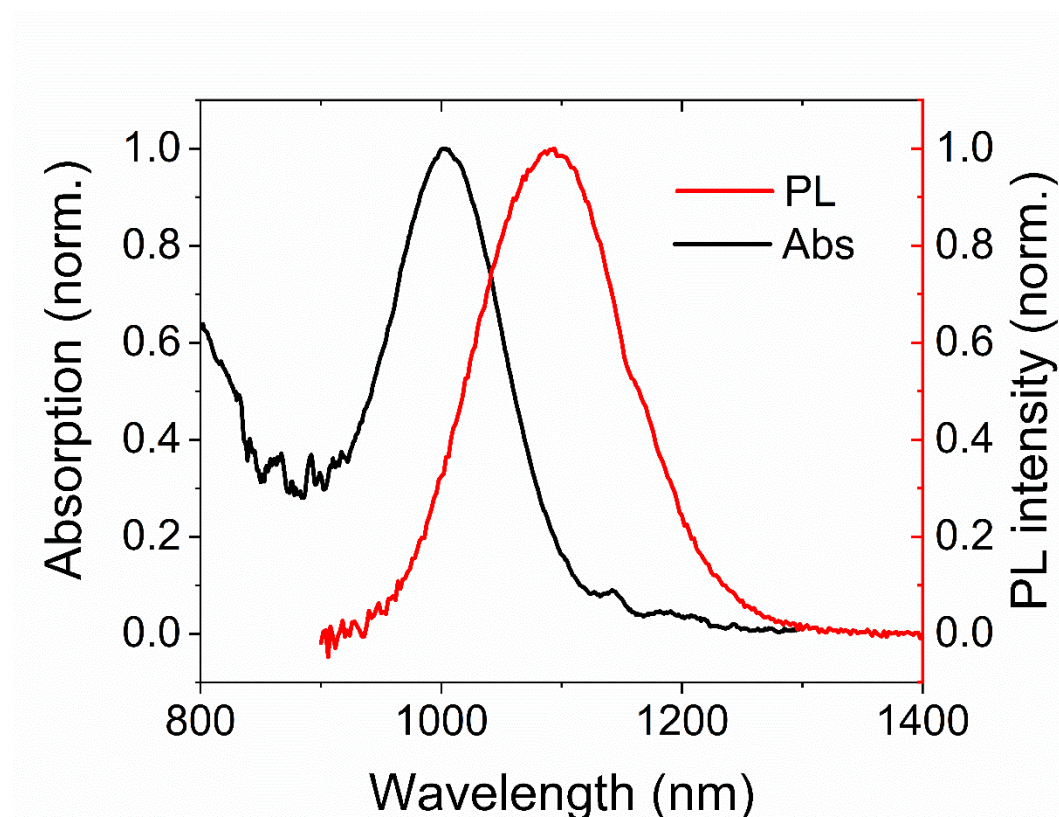

**Figure S1.** The absorption and PL spectra of PbS QDs with a 3.6 nm diameter, synthesized for the experiment.

Figure S2 shows the rGO FTIR spectra before and after functionalization with 3-mercaptopropyltrimethoxysilane (MPTS) molecules. New peaks for Si-O-C, Si-C, and -CH<sub>2</sub>-CH<sub>2</sub>- indicate an effective functionalization.

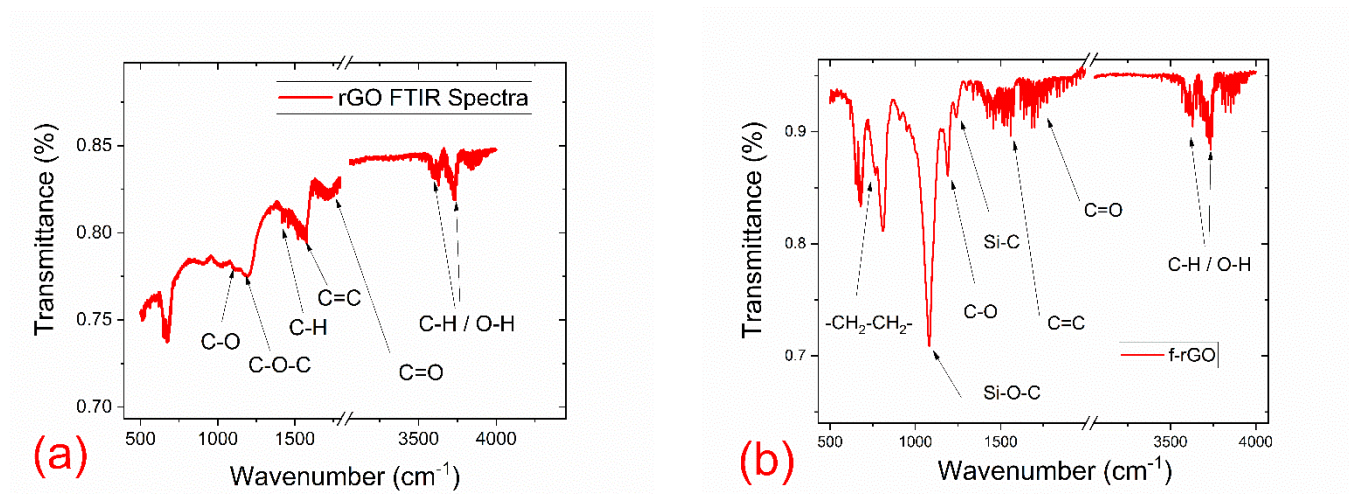

**Figure S2.** FTIR spectra of rGO sheets before (a) and after (b) functionalization.

Figure S3 presents the SEM images of the initial rGO. A variety of sheet sizes and shapes can be observed.

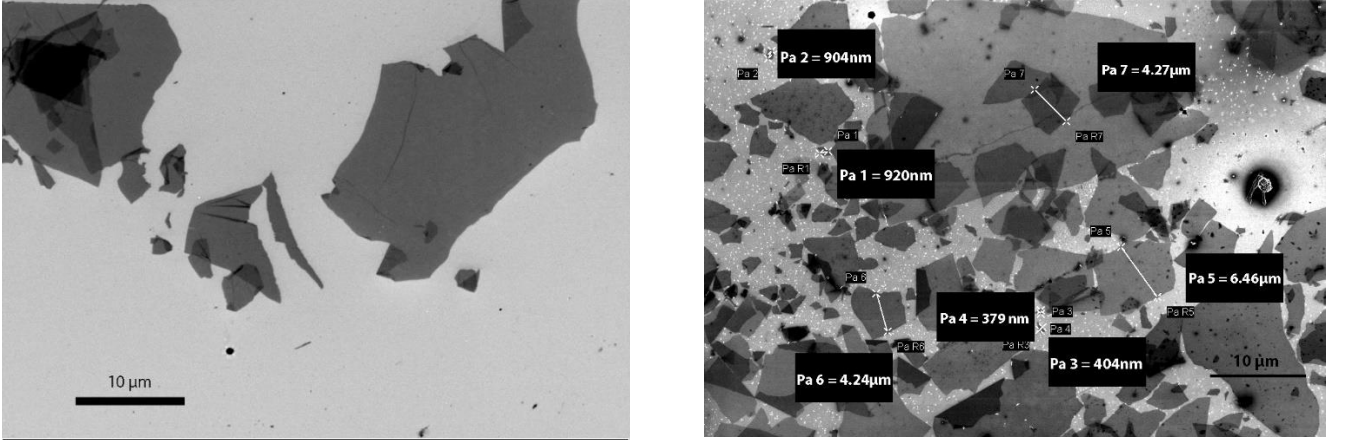

**Figure S3.** SEM images of rGO sheets.

### The $\tau_{av}$ to rGO/QD Ratio Plot Simulation

The average PL lifetime in a system with charge transfer induced PL quenching was simulated. As discussed, the only way to observe the dependence of the average PL lifetime  $\tau_{av}$  to reduced graphene oxide (rGO)/quantum dots (QDs) ratio is to suggest an independent rGO-discharging process. The resulting PL would be a sum of that from quenched and unquenched QDs. Changing the rGO/QD ratio also changes the quenched/unquenched QDs ratio. We simulated the dependence by changing the quantity of unquenched QDs and using the expression below for average PL lifetime:

$$\tau_{av} = \frac{A_0 t_0 + A_q t_q}{A_0 + A_q},$$

where  $A_0 = N_0 Q_0$  and  $A_q = N_q Q_q$  are the amplitudes of the unquenched and quenched QDs, respectively;  $N_0$  and  $N_q$  are the numbers of unquenched and quenched QDs, respectively;  $Q_0$  and  $Q_q$  are the quantum yields of unquenched and quenched QDs, respectively; and  $t_0$  and  $t_q$  are the PL lifetimes of unquenched and quenched QDs, respectively.

Figure S4 shows the  $\tau_{av}$  vs. rGO/QD ratio plot, assuming that PL quenching is caused solely by charge transfer, together with experimental results. Clearly, the simulation could not explain the experimental data.

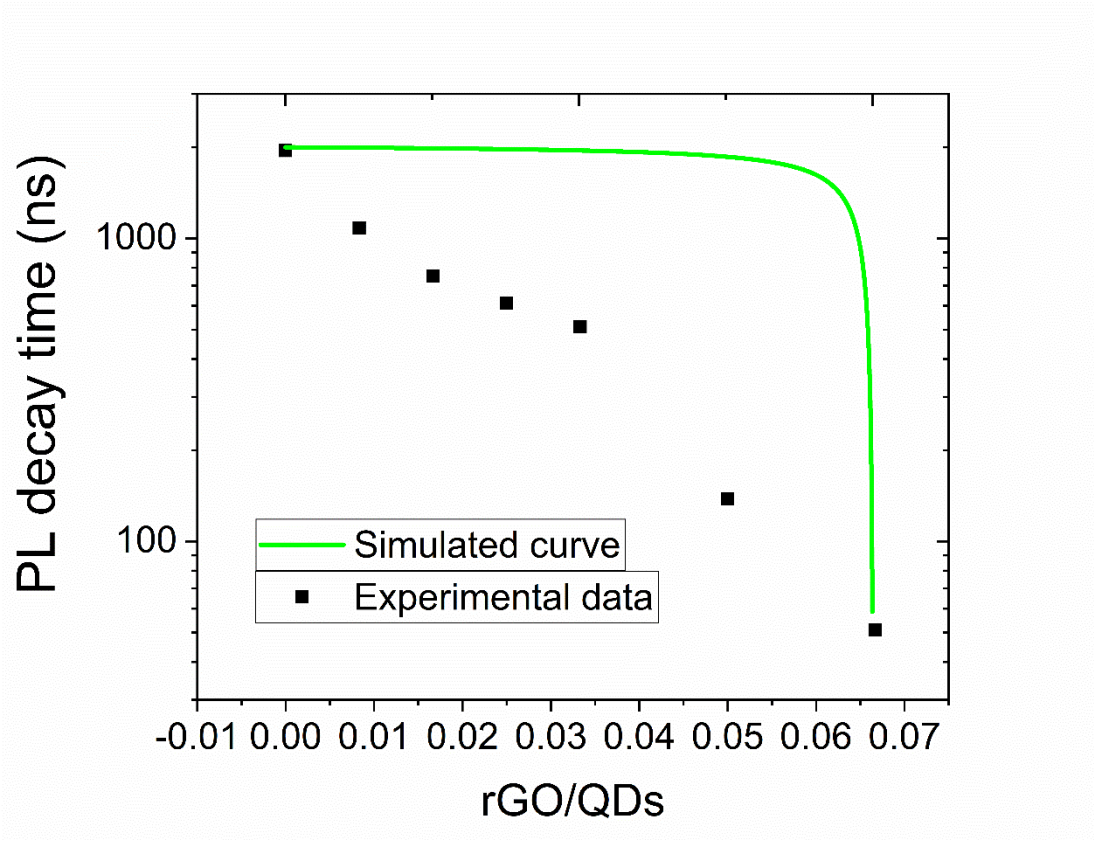

**Figure S4.** Simulated plot of  $\tau_{av}$  vs. rGO/QD ratio assuming that PL quenching is caused by charge transfer only.

For a valid calculation of the average PL lifetime of the system with Auger-induced quenched QDs, we required an accurate energy transfer model for the QDs on the rGO sheet. In the observed system, the following dependences can be noted for average inter-dot distance on the rGO sheet ( $R$ ) and the number of QDs with  $i$  and  $i + 1$  excess holes on the rGO sheet ( $N_{Hi}$ ,  $N_{Hi+1}$ ):  $R \propto N_{rGO}/N_{QDs}$ ,  $N_{Hi+1}/N \propto N_{rGO}/N_{QDs}$ .

It is important to note that charged QDs exhibit a 28 meV red shift. Therefore, energy transfer from charged QDs to uncharged (or less charged) QDs is prohibited since the energy shift  $> kT$ .

The rGO possesses an aperiodic structure with randomly located functional groups; thus, the QDs positions on the rGO sheet are also randomized. Since the Förster resonance energy transfer (FRET)  $\propto R^6$ , randomization of QDs positions on the rGO sheet is required.

Simulation of the average PL lifetimes of the rGO-QD system involved the following steps:

(1) The blinking and FRET models were applied for the following calculations. The quantum yield (QY) of the initial QDs and the PL lifetimes of QDs in the  $H_0$  and  $H_1$  states were used to calculate the QDs QY in state  $H_i$ . PL lifetimes within the QD in state  $H_i$  were determined using the following equations [1]:

$$\begin{aligned} \tau_{PL}^{(i)} &= \frac{1}{k_r^{(i)} + k_{nr} + k_A^{(i)}}, \\ k_r^{(i)} &= n_e n_h k_r, \\ k_A^{(i)} &= n_e n_h (n_e + n_h - 2) k_A, \\ n_h &= 1 + i, n_e = 1 \\ Q_1/Q_0 &= 2 \left( \tau_{PL}^1 / \tau_{PL}^0 \right), \end{aligned}$$

$$Q_2/Q_1 = 3/2 \left( \tau_{PL}^2 / \tau_{PL}^1 \right),$$

where  $n_e$  and  $n_h$  are the number of electrons and holes in the QD;  $k_r^i$  is the rate of radiative recombination in the QD with  $i$  excess charge carriers;  $k_A^{(i)}$  is the rate of Auger-recombination in the QD with  $i$  excess charge carriers;  $Q_{0,1,2}$  are the PL quantum yields of QDs with zero, one, and two excess charge carriers;  $\tau_{PL}^{(i)}$  is the PL lifetime within a QD with  $i$  excess charge carriers;  $k_r^{(i)}$  and  $k_A^{(i)}$  are the radiative and Auger recombination rates in QDs with  $i$  excess charge carriers, respectively;  $k_r$  and  $k_{nr}$  are the radiative and non-radiative recombination rates of the initial QDs, respectively; and  $k_A$  is the Auger recombination rate.

The Förster radius,  $R_F$ , for the FRET was computed from the Förster model [2] as:

$$R_F^6 = \frac{9000 \ln 10 k^2 QY_d}{128 \pi^5 n^4 N_a} \int I_D(v) \epsilon_D(v) v^{-4} dv,$$

where  $\int I_D(v) \epsilon_D(v) v^{-4} dv$  is the integral of overlap between donor emission  $I_D(v)$  and acceptor absorption  $\epsilon_D(v)$  using a wavenumber scale  $v$ ,  $k$  is the orientation factor,  $n$  is the medium refractive index,  $N_a$  is the Avogadro constant, and  $QY_d$  is the donor quantum yield.

The initial distance between the QDs was determined from considerations of QD closely packed at low rGO/QD rates:

$$R_0 = d_{QD} + 2 * r_{shell}$$

in the plane of the sheet and for the QDs on opposite sides of the rGO sheet:

$$R_{0z} = d_{QD} + 2 * r_{MPTS} + \text{rGO thickness}$$

where  $d_{QD}$  is the QD diameter,  $r_{shell}$  is the oleic acid molecule length, and  $r_{MPTS}$  is the MPTS molecule length.

(2) The QDs positions on the rGO sheet are represented in the form of two  $100 \times 100$  arrays in the calculation for the front and back planes of the sheet. The array elements represent the states of the QDs: zero for  $H_i$  and 1 for  $H_{i+1}$ . Each QD in the array has four attributes: the relative PL intensity, PL lifetime, QY, and a vector of QD location counted from the QD's central position. The central position can be visualized as the geometric center of a square of side  $R_0$  on the rGO sheet. The similar  $100 \times 100$  squares contain QDs.

(3) The number of QDs in the  $H_{i+1}$  state is used as the index for iteration. Since  $N_{H_{i+1}}/N \propto N_{rGO}/N_{QDs}$ , and  $N = 20,000$  is the total number of QDs, it can be argued that  $\tau_{av}(N_{H_{i+1}})$  will have the same shape as  $\tau_{av}(N_{rGO}/N_{QDs})$ .

(4) The index for iteration takes values from 0 to  $N = 20,000$ . For each value of  $N_{H_{i+1}}$ , the QD arrays are filled with  $N - N_{H_{i+1}}$  zeroes and  $N_{H_{i+1}}$  ones with a relative PL intensity equal to unity, corresponding PL lifetime, QY, and location vectors. The side of the square area occupied by the QD is calculated as:  $r = R_0 * \sqrt{(1 + \frac{N_1}{N})}$ , and the location vector length is limited by the value,  $\sqrt{2} \frac{r - d_{QD} - r_{shell}}{2}$ . After the creation of the QD arrays and their attributes, the FRET rate is calculated for the nine nearest neighbors to each QD as  $k_T(r) = \frac{1}{\tau_D} \left( \frac{R_F}{r} \right)^6$  where  $\tau_D$  is the donor PL lifetime. The energy transfer efficiency for each QD can be found according to:

$$E = \frac{k_T(r)}{\tau_D^{-1} + k_T(r)},$$

The value of each QD PL amplitude is reduced by the value of  $E$  multiplied by the current QD amplitude value, while the reduction value is transferred to the neighboring QD amplitudes scaled by the  $k_T(r)$  value of each neighboring QD. The reduction and increase for each QD are calculated simultaneously for the iteration number equal to  $\tau_i \sum_n k_T(r_n)$  average value, where  $n$  is the index for the nine neighbors of the QD.

Finally, the average PL lifetime of the system is calculated as:

$$\tau_{av} = \frac{\sum_j \alpha_j \tau_j Q_j}{\sum_j \alpha_j Q_j},$$

where  $\tau_j$  is the PL lifetime of the QD;  $\alpha_j$  is the QD amplitude; and  $Q_j$  is the QY of the QD.

The experimental methods used for the 4.8 nm QDs were the same as those used for the main experiment. The resulting average PL lifetimes vs rGO/QDs plot is shown in Figure S5.

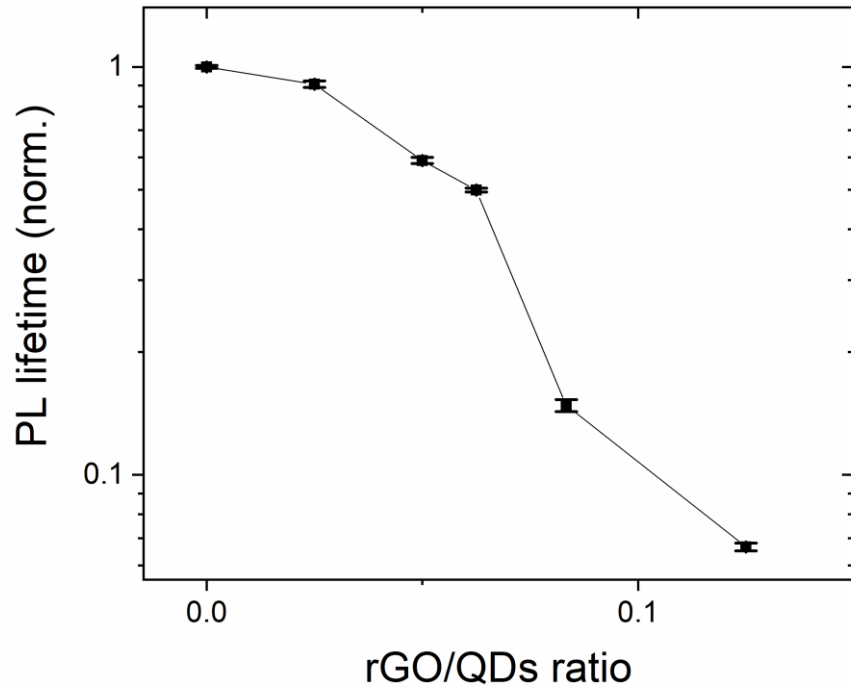

**Figure S5.** Plot of  $\tau_{av}$  vs. rGO/QD ratio in the rGO-PbS system with 4.8 nm QDs.

The PL decay curves from Figures 1a, 3a, and 4b of the manuscript are shown with fitting curves in Figure S6.

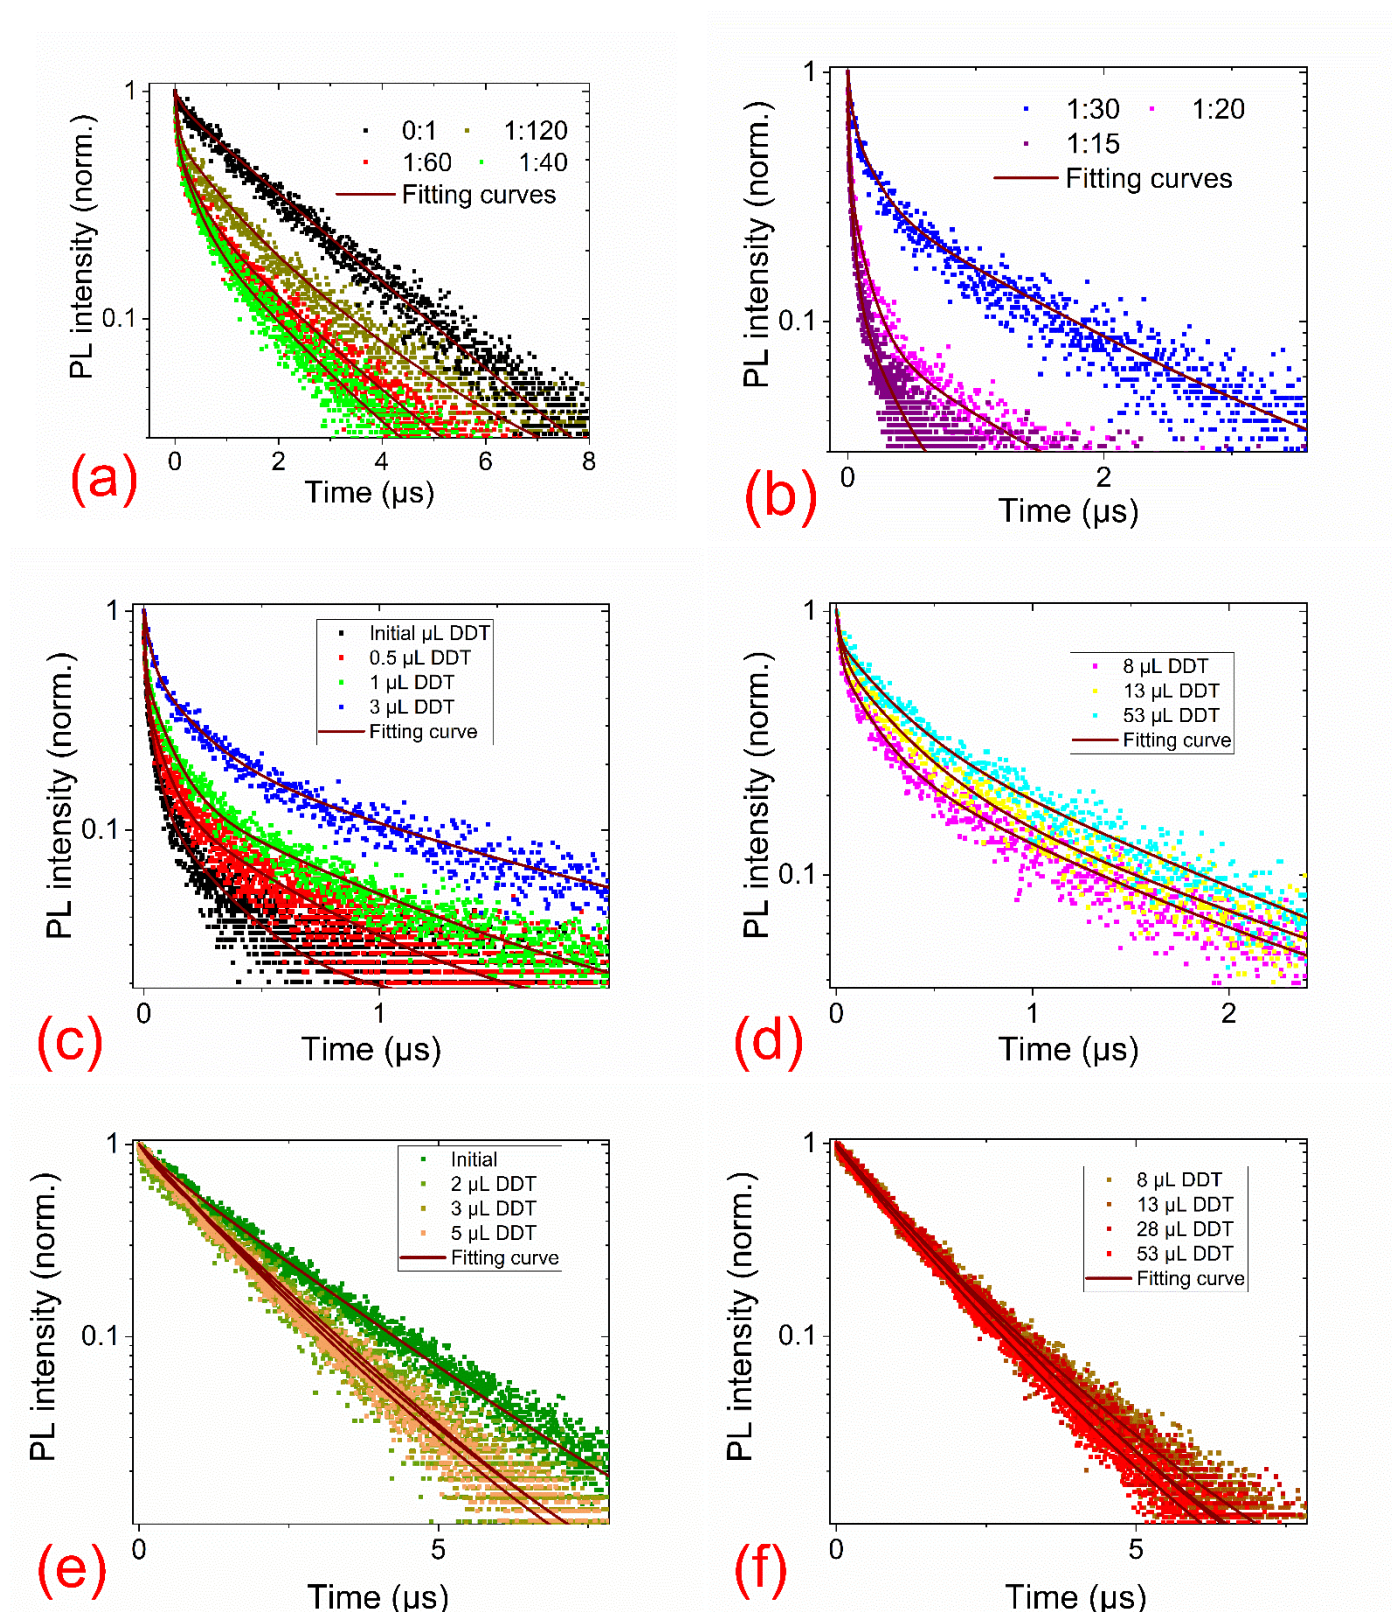

**Figure S6.** PL decay curves with fitting curves for QD-rGO systems with various rGO/QD ratios (a,b); the 1:15 QD-rGO system with different amounts of added DDT (c,d); and for PbS QD solution with different amounts of added DDT (e,f).

## Reference

- Galland, C.; Ghosh, Y.; Steinbrück, A.; Sykora, M.; Hollingsworth, J.A.; Klimov, V.I.; Htoon, H. Two types of luminescence blinking revealed by spectroelectrochemistry of single quantum dots. *Nature* **2011**, *479*, 203–207, doi:10.1038/nature10569.
- Lakowicz, J.R. *Principles of Fluorescence Spectroscopy*; Springer: New York, USA, 2006; ISBN 0387312781.
